# Supplementary material
Source: PubMed Central journal article supplement (PMC4101537)
Supplement: NIHMS594449-supplement-Supplementary_Data.pdf [file NIHMS594449-supplement-Supplementary_Data.pdf]

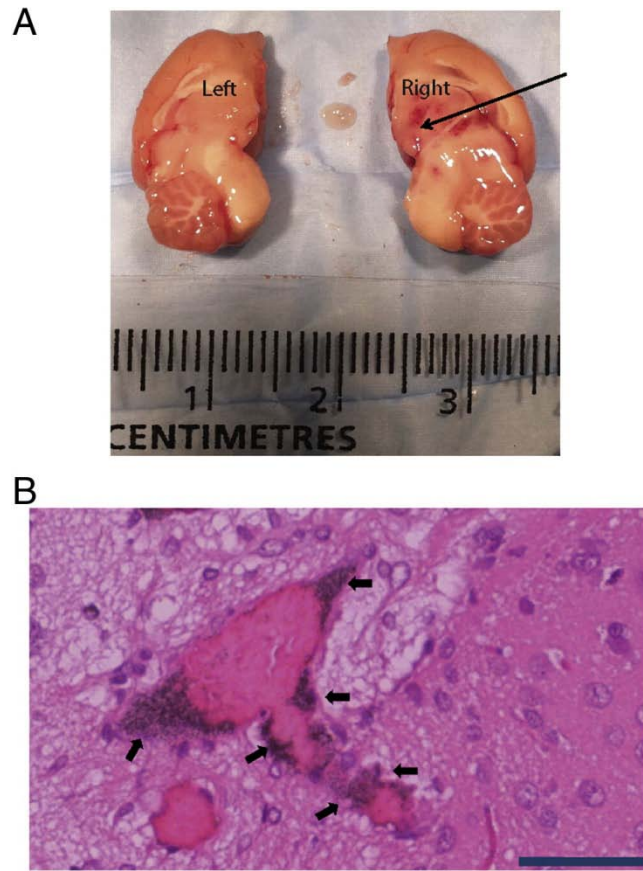

**Figure 1. Gross pathology and histological (MRI) demonstration of BBB disruption by MRgFUS.** (A) Gross pathology of the brain showing areas of extravasation (arrow) suggestive of BBB disruption within the right paramedian hemispheric surface that underwent MRgFUS. The left paramedian hemispheric surface appears normal – this hemisphere was not treated with MRgFUS. (B) Demonstration of AuNP extravasation (arrow) by silver enhancement and H&E histology within the right brain hemisphere (scale bar 50  $\mu\text{m}$ ).

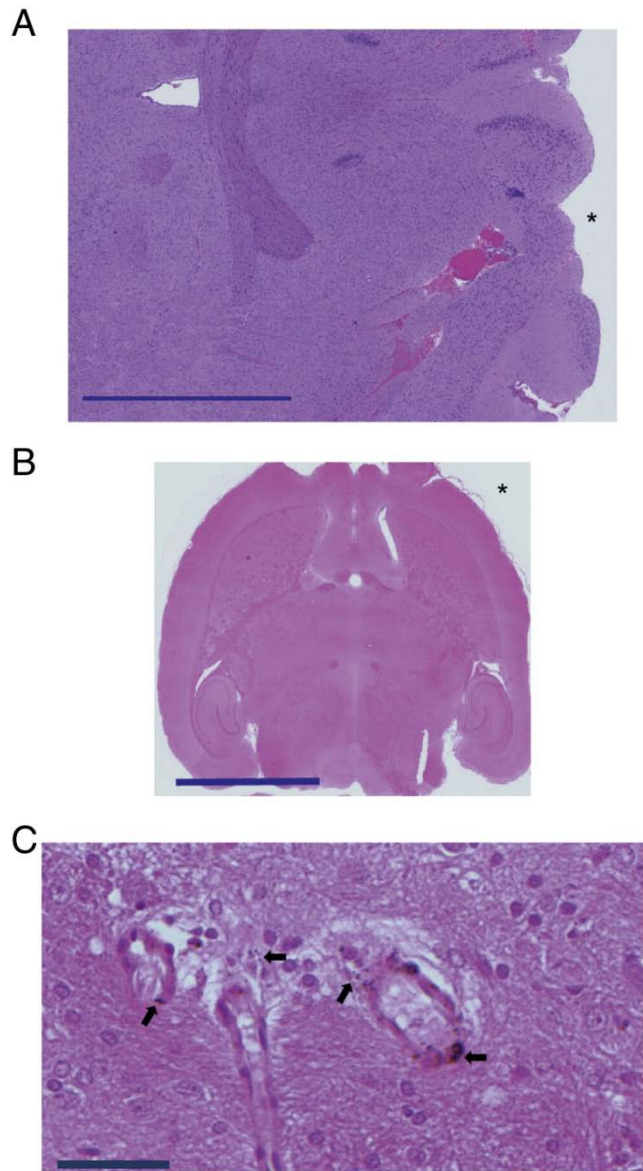

**Figure 2. Brain histology in the subacute phase after BBB opening for delivery of AuNPs.** (A) Resolving hemorrhage in the subcortical zone of the right frontal lobe (scale bar 2 mm, star marks right hemisphere). (B) Axial section at the level of the temporal lobes demonstrating normal brain structures (scale bar 5 mm, star marks right hemisphere). (C) AuNPs in the periventricular and parenchymal location (arrows) with no associated hemorrhage, necrosis, or inflammation (scale bar 50  $\mu\text{m}$ ).

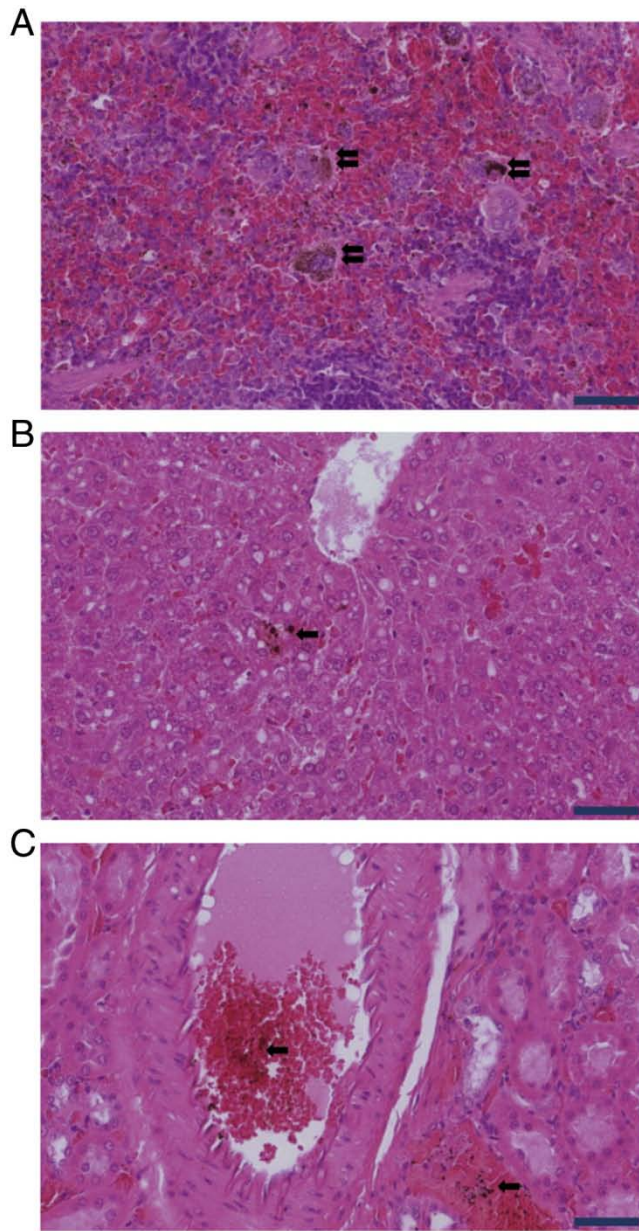

**Figure 3. Spleen, liver and kidney histology following AuNP CNS delivery by MRgFUS.**

(A) Demonstration of AuNPs by silver enhancement and H&E histology Etame et al.

Enhanced delivery of gold nanoparticles with therapeutic potential into the brain using

MRI-guided focused ultrasound. - 2 - within the spleen following MRgFUS. The AuNPs are

shown (double arrows) within splenic macrophages (scale bar 50  $\mu$ m). (B) Demonstration

(arrow) of AuNPs by silver enhancement and H&E histology within the liver following

MRgFUS (scale bar 50  $\mu\text{m}$ ). (C) Demonstration (arrow) of AuNPs by silver enhancement and H&E histology within the kidney following MRgFUS (scale bar 50  $\mu\text{m}$ ).
